# Supplementary material for: Comparative analysis of the chicken IFITM locus by targeted genome sequencing reveals evolution of the locus and positive selection in IFITM1 and IFITM3
Source: PubMed Central journal article supplement (PMC6451222; doi:10.1186/s12864-019-5621-5), 2019-04-05

|                 | Line N                                                                                                                   | Line C                                                                                                                                  | Line P                                                                                                                    | Line 6                                                                                                                    | Line 0                                                                                                                    | Line 7                                                                                                      | Line 15I                                                                                                                                |
|-----------------|--------------------------------------------------------------------------------------------------------------------------|-----------------------------------------------------------------------------------------------------------------------------------------|---------------------------------------------------------------------------------------------------------------------------|---------------------------------------------------------------------------------------------------------------------------|---------------------------------------------------------------------------------------------------------------------------|-------------------------------------------------------------------------------------------------------------|-----------------------------------------------------------------------------------------------------------------------------------------|
| Individuals     | 9                                                                                                                        | 10                                                                                                                                      | 9                                                                                                                         | 9                                                                                                                         | 9                                                                                                                         | 8                                                                                                           | 10                                                                                                                                      |
| Breed           | White Leghorn                                                                                                            | White Leghorn                                                                                                                           | White Leghorn                                                                                                             | White Leghorn                                                                                                             | White Leghorn                                                                                                             | White Leghorn                                                                                               | White Leghorn                                                                                                                           |
| Origin          | Cornell University                                                                                                       | Reaseheat Laboratory                                                                                                                    | Cornell University                                                                                                        | ADOL East Lansing, 1939                                                                                                   | ADOL, East Lansing                                                                                                        | ADOL East Lansing, 1939                                                                                     | ADOL East Lansing, 1939                                                                                                                 |
| Imported        | 1982                                                                                                                     | 1969                                                                                                                                    | 1996                                                                                                                      | 1972                                                                                                                      | 1985                                                                                                                      | 1972                                                                                                        | 1962                                                                                                                                    |
| MHC             | B <sup>21</sup>                                                                                                          | B <sup>4</sup> /B <sup>4</sup> , B <sup>12</sup> /B <sup>12</sup> , B <sup>4</sup> /B <sup>13</sup>                                     | B <sup>19</sup>                                                                                                           | B <sup>2</sup>                                                                                                            | B <sup>21</sup>                                                                                                           | B <sup>2</sup>                                                                                              | B <sup>15</sup>                                                                                                                         |
| Susceptible     |                                                                                                                          | LLV Subgroup A, B, C, D                                                                                                                 | MDV                                                                                                                       | LLV Subgroup A, B, C, D                                                                                                   | LLV Subgroup A, B, C, D                                                                                                   | LLV Subgroup A, B, C, D                                                                                     | LLV subgroups A, C; segregating for B, D, E. Moderately susceptible to MDV                                                              |
| Resistant       | MDV                                                                                                                      | MDV                                                                                                                                     |                                                                                                                           | MDV, LLV tumor development                                                                                                | MDV                                                                                                                       | MDV, LLV tumor development                                                                                  |                                                                                                                                         |
| Type            | Partial Inbred                                                                                                           | Inbred                                                                                                                                  | Partial Inbred                                                                                                            | Inbred                                                                                                                    | Partial Inbred                                                                                                            | Inbred                                                                                                      |                                                                                                                                         |
| Histocompatible |                                                                                                                          |                                                                                                                                         |                                                                                                                           | Line 7 <sub>2</sub> skin grafting, cell exchange                                                                          |                                                                                                                           | Line 6 <sub>1</sub> skin grafting, cell exchange                                                            |                                                                                                                                         |
| ENA sample ID   | 20172_1#1<br>20172_1#9<br>20172_1#17<br>20172_1#25<br>20172_1#33<br>20172_1#39<br>20172_1#46<br>20172_1#53<br>20172_1#60 | 20172_1#2<br>20172_1#10<br>20172_1#18<br>20172_1#26<br>20172_1#34<br>20172_1#40<br>20172_1#47<br>20172_1#54<br>20172_1#61<br>20172_1#65 | 20172_1#3<br>20172_1#11<br>20172_1#19<br>20172_1#27<br>20172_1#35<br>20172_1#41<br>20172_1#48<br>20172_1#55<br>20172_1#66 | 20172_1#4<br>20172_1#12<br>20172_1#20<br>20172_1#28<br>20172_1#36<br>20172_1#42<br>20172_1#49<br>20172_1#56<br>20172_1#62 | 20172_1#5<br>20172_1#13<br>20172_1#21<br>20172_1#29<br>20172_1#43<br>20172_1#50<br>20172_1#57<br>20172_1#63<br>20172_1#67 | 20172_1#6<br>20172_1#14<br>20172_1#22<br>20172_1#30<br>20172_1#37<br>20172_1#44<br>20172_1#51<br>20172_1#58 | 20172_1#7<br>20172_1#15<br>20172_1#23<br>20172_1#31<br>20172_1#38<br>20172_1#45<br>20172_1#52<br>20172_1#59<br>20172_1#64<br>20172_1#68 |

**Total: 63**

| <b>ENA ID</b> | <b>Breed</b>             | <b>Tissue type</b> |
|---------------|--------------------------|--------------------|
| 20819 1#6     | Brakel                   | Muscle             |
| 20819 1#7     | Frizzle                  | Muscle             |
| 20819 1#8     | La Flèche                | Muscle             |
| 20819 1#9     | Minorca                  | Muscle             |
| 20819 1#10    | Ko Shamo Bantam          | Muscle             |
| 20819 1#11    | Minorca                  | Muscle             |
| 20819 1#12    | Yokoama                  | Muscle             |
| 20819 1#13    | Booted Bantam            | Muscle             |
| 20819 1#14    | Brahma                   | Muscle             |
| 20819 1#15    | Czeck                    | Muscle             |
| 20819 1#16    | Game Shamo               | Muscle             |
| 20819 1#17    | Japanese Bantam          | Muscle             |
| 20819 1#18    | Padua Bantam             | Muscle             |
| 20819 1#19    | Pekin Bantam             | Muscle             |
| 20819 1#20    | Wyandotte                | Muscle             |
| 20819 1#21    | Plymouth Rock            | Blood              |
| 20819 1#22    | Leghorn                  | Blood              |
| 20819 1#23    | Amrock                   | Blood              |
| 20819 1#25    | Ko Shamo Bantam          | Blood              |
| 20819 1#26    | Asil                     | Blood              |
| 20819 1#27    | Rhode-Island             | Blood              |
| 20819 1#28    | Australop                | Blood              |
| 20819 1#29    | Vorwerk                  | Blood              |
| 20819 1#30    | Marans                   | Blood              |
| 20819 1#31    | Barbu D'Anvers           | Blood              |
| 20819 1#32    | Czech bt.                | Blood              |
| 20819 1#33    | Barnevelder Bantam       | Muscle             |
| 20819 1#35    | K71 Leghorn              | Muscle             |
| 20819 1#36    | Silkie                   | Muscle             |
| 20819 1#37    | Araucana                 | Muscle             |
| 20819 1#38    | Barnevelder              | Muscle             |
| 20819 1#39    | Padua                    | Muscle             |
| 20819 1#40    | Phoenix                  | Muscle             |
| 20819 1#41    | Rosecomb Bantam          | Muscle             |
| 20819 1#42    | Sebright Bantam          | Muscle             |
| 20819 1#43    | Transylvanian Naked Neck | Muscle             |
| 20819 1#44    | Welssummer               | Muscle             |

Total: 37

| <b>Supermarket</b> | <b>Standard</b>                       | <b>Free range</b> | <b>Organic</b> | <b>Tissue type</b> |
|--------------------|---------------------------------------|-------------------|----------------|--------------------|
| <b>ENA ID</b>      |                                       |                   |                |                    |
| <b>Aldi</b>        | 20172_1#69                            | 20819_1#57        | NA             | Breast             |
| <b>Cooperative</b> | 20172_1#16<br>20172_1#70<br>20819_1#5 | 20819_1#46        | NA             | Breast             |
| <b>M&amp;S</b>     | 20172_1#24<br>20172_1#71              | 20819_1#58        | 20819_1#59     | Thighs/Breast      |
| <b>Sainsbury's</b> | 20172_1#32<br>20172_1#72<br>20819_1#2 | 20819_1#50        | 20819_1#49     | Breast             |
| <b>Tesco</b>       | 20819_1#1                             | 20819_1#52        | 20819_1#51     | Breast             |
| <b>Waitrose</b>    | 20172_1#74<br>20819_1#34              | 20819_1#60        | 20819_1#53     | Breast             |
| <b>Morrison's</b>  | 20819_1#47                            | NA                | 20819_1#48     | Breast             |
| <b>ASDA</b>        | 20819_1#45                            | 20819_1#56        | NA             | Breast             |

Total: 26

| ENA ID     | Sample       | Provenience/village      | Breed               | Sample | ENA ID     | Provenience | Breed                  |
|------------|--------------|--------------------------|---------------------|--------|------------|-------------|------------------------|
| 24083_1#1  | Abb-3c       | Ethiopia/Batambie        | NA                  | 11     | 24083_1#42 | Nigeria     | Onigbaogbe/Rose comb   |
| 24083_1#2  | Abb-4h2      | Ethiopia/Batambie        | NA                  | 12     | 24083_1#43 | Nigeria     | Onigbaogbe/Rose comb   |
| 24083_1#3  | Afa-6h       | Ethiopia/Amesha Shinkuri | NA                  | 13     | 24083_1#44 | Nigeria     | Onigbaogbe/Rose comb   |
| 24083_1#4  | Asa-4c       | Ethiopia/Ashuda          | NA                  | 14     | 24083_1#45 | Nigeria     | Onigbaogbe/Rose comb   |
| 24083_1#5  | Asa-8c       | Ethiopia/Ashuda          | NA                  | 15     | 24083_1#46 | Nigeria     | Onigbaogbe/Rose comb   |
| 24083_1#6  | Asa-9c       | Ethiopia/Ashuda          | NA                  | 16     | 24083_1#47 | Nigeria     | Onigbaogbe/Rose comb   |
| 24083_1#7  | Asd-2h       | Ethiopia/Dikuli          | NA                  | 17     | 24083_1#48 | Nigeria     | Onigbaogbe/Rose comb   |
| 24083_1#8  | Dz-18        | Ethiopia/Improved Horro  | NA                  | 18     | 24083_1#49 | Nigeria     | Onigbaogbe/Rose comb   |
| 24083_1#9  | Dz-26        | Ethiopia/Improved Horro  | NA                  | 19     | 24083_1#50 | Nigeria     | Onigbaogbe/Rose comb   |
| 24083_1#10 | Agt-3h       | Ethiopia/Tsion Teguaz    | NA                  | 20     | 24083_1#51 | Nigeria     | Onigbaogbe/Rose comb   |
| 24083_1#11 | Agt-6h       | Ethiopia/Tsion Teguaz    | NA                  | 21     | 24083_1#52 | Nigeria     | Abolorun/Naked neck    |
| 24083_1#12 | Tssm-64h     | Ethiopia/Metkilimat      | NA                  | 22     | 24083_1#53 | Nigeria     | Abolorun/Naked neck    |
| 24083_1#13 | Tssm-68c     | Ethiopia/Metkilimat      | NA                  | 23     | 24083_1#54 | Nigeria     | Abolorun/Naked neck    |
| 24083_1#14 | Tssg-07h     | Ethiopia/Metkilimat      | NA                  | 24     | 24083_1#55 | Nigeria     | Abolorun/Naked neck    |
| 24083_1#15 | Afdk-c3      | Ethiopia/Kefis           | NA                  | 25     | 24083_1#56 | Nigeria     | Abolorun/Naked neck    |
| 24083_1#16 | Amna-7h-144  | Ethiopia/Negasi Amba     | NA                  | 26     | 24083_1#57 | Nigeria     | Abolorun/Naked neck    |
| 24083_1#17 | Amam-3h-124  | Ethiopia/Alfa Midir      | NA                  | 27     | 24083_1#58 | Nigeria     | Abolorun/Naked neck    |
| 24083_1#18 | Amam-4h-115  | Ethiopia/Alfa Midir      | NA                  | 28     | 24083_1#59 | Nigeria     | Abolorun/Naked neck    |
| 24083_1#19 | Amam-5c-147  | Ethiopia/Alfa Midir      | NA                  | 29     | 24083_1#60 | Nigeria     | Abolorun/Naked neck    |
| 24083_1#20 | Amam-6h-120  | Ethiopia/Alfa Midir      | NA                  | 30     | 24083_1#61 | Nigeria     | Abolorun/Naked neck    |
| 24083_1#21 | Amam-7c-116  | Ethiopia/Alfa Midir      | NA                  | 31     | 24083_1#62 | Nigeria     | Opipi/featherless wing |
| 24083_1#22 | Amam-9c-107  | Ethiopia/Alfa Midir      | NA                  | 32     | 24083_1#63 | Nigeria     | Opipi/featherless wing |
| 24083_1#23 | Amam-10h-108 | Ethiopia/Alfa Midir      | NA                  | 33     | 24083_1#64 | Nigeria     | Opipi/featherless wing |
| 24083_1#24 | Amam-1h-031  | Ethiopia/Alfa Midir      | NA                  | 34     | 24082_1#1  | Nigeria     | Opipi/featherless wing |
| 24083_1#25 | Amam-2c-151  | Ethiopia/Alfa Midir      | NA                  | 35     | 24082_1#2  | Nigeria     | Opipi/featherless wing |
| 24083_1#26 | Odb-1h-076   | Ethiopia/Bekele Girissa  | NA                  | 36     | 24082_1#3  | Nigeria     | Opipi/featherless wing |
| 24083_1#27 | Odb-8h-013   | Ethiopia/Bekele Girissa  | NA                  | 37     | 24082_1#4  | Nigeria     | Opipi/featherless wing |
| 24083_1#28 | Ods-5c-086   | Ethiopia/Bekele Girissa  | NA                  | 38     | 24082_1#5  | Nigeria     | Opipi/featherless wing |
| 24083_1#29 | Sdl-3c-019   | Ethiopia/Loya            | NA                  | 39     | 24082_1#6  | Nigeria     | Opipi/featherless wing |
| 24083_1#30 | Sdl-6h-057   | Ethiopia/Loya            | NA                  | 40     | 24082_1#7  | Nigeria     | Opipi/featherless wing |
| 24083_1#31 | Sdl-8c-090   | Ethiopia/Loya            | NA                  | 41     | 24082_1#8  | Nigeria     | Ibile/Wild type        |
| 24083_1#32 | 1            | Nigeria                  | Asa/Frizzle feather | 42     | 24082_1#9  | Nigeria     | Ibile/Wild type        |
| 24083_1#33 | 2            | Nigeria                  | Asa/Frizzle feather | 43     | 24082_1#10 | Nigeria     | Ibile/Wild type        |
| 24083_1#34 | 3            | Nigeria                  | Asa/Frizzle feather | 44     | 24082_1#11 | Nigeria     | Ibile/Wild type        |
| 24083_1#35 | 4            | Nigeria                  | Asa/Frizzle feather | 45     | 24082_1#12 | Nigeria     | Ibile/Wild type        |
| 24083_1#36 | 5            | Nigeria                  | Asa/Frizzle feather | 46     | 24082_1#13 | Nigeria     | Ibile/Wild type        |
| 24083_1#37 | 6            | Nigeria                  | Asa/Frizzle feather | 47     | 24082_1#14 | Nigeria     | Ibile/Wild type        |
| 24083_1#38 | 7            | Nigeria                  | Asa/Frizzle feather | 48     | 24082_1#15 | Nigeria     | Ibile/Wild type        |
| 24083_1#39 | 8            | Nigeria                  | Asa/Frizzle feather | 49     | 24082_1#16 | Nigeria     | Ibile/Wild type        |
| 24083_1#40 | 9            | Nigeria                  | Asa/Frizzle feather | 50     | 24082_1#17 | Nigeria     | Ibile/Wild type        |
| 24083_1#41 | 10           | Nigeria                  | Asa/Frizzle feather |        |            |             |                        |

A.

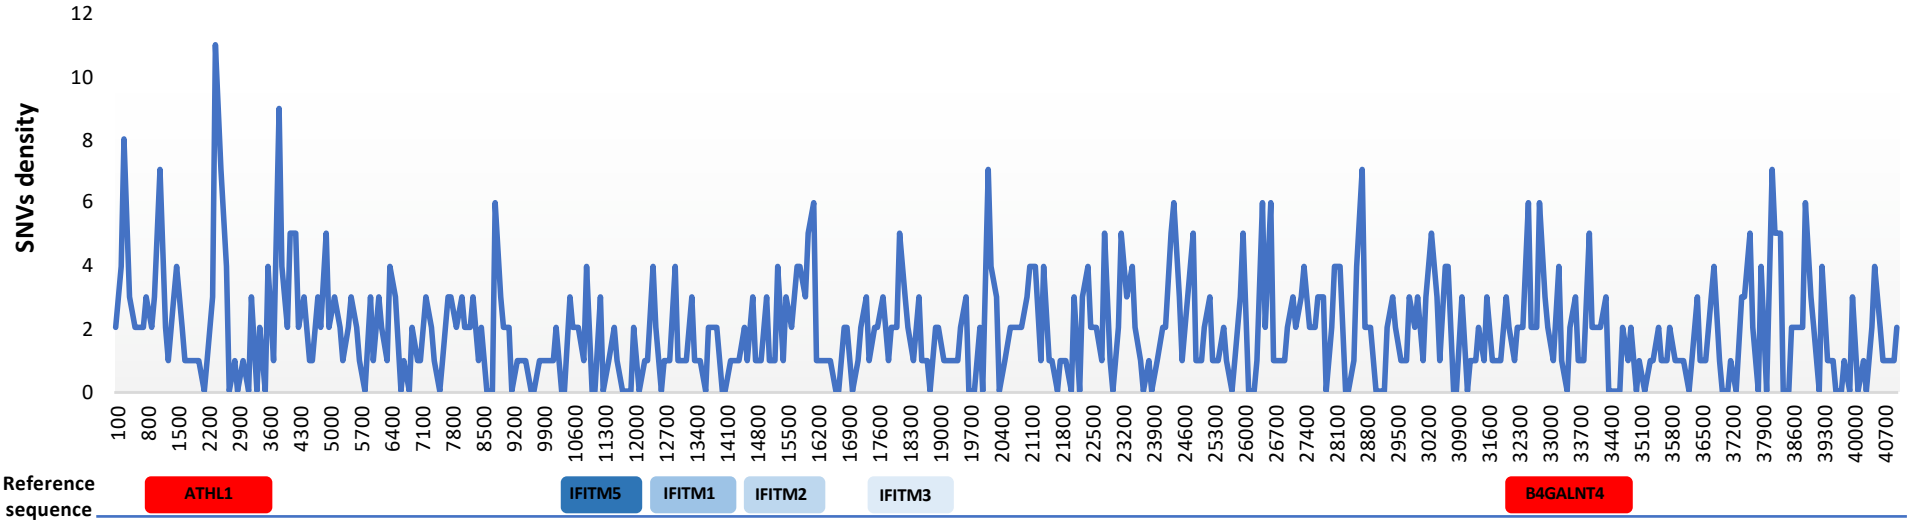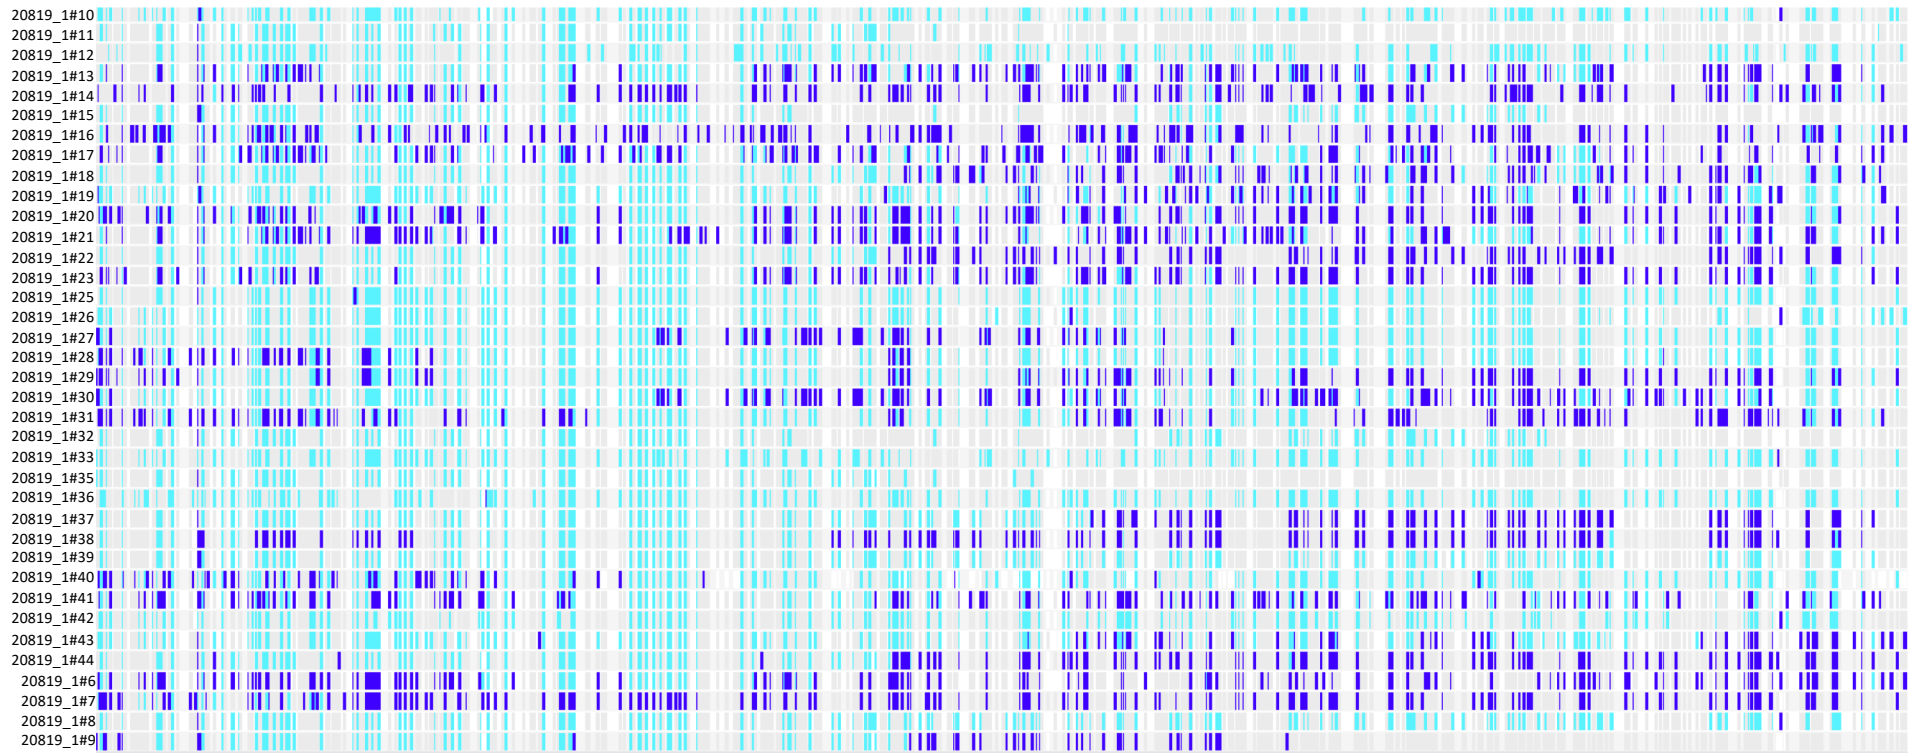

B.

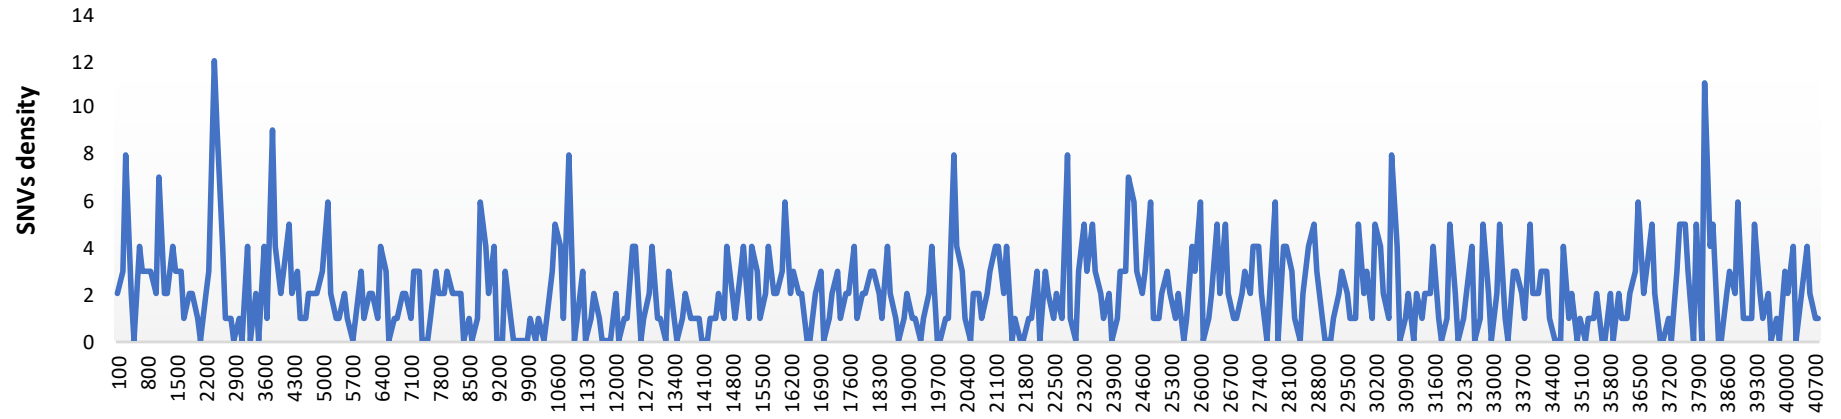

Reference  
sequence

ATHL1

IFITM5

IFITM1

IFITM2

IFITM3

B4GALNT4

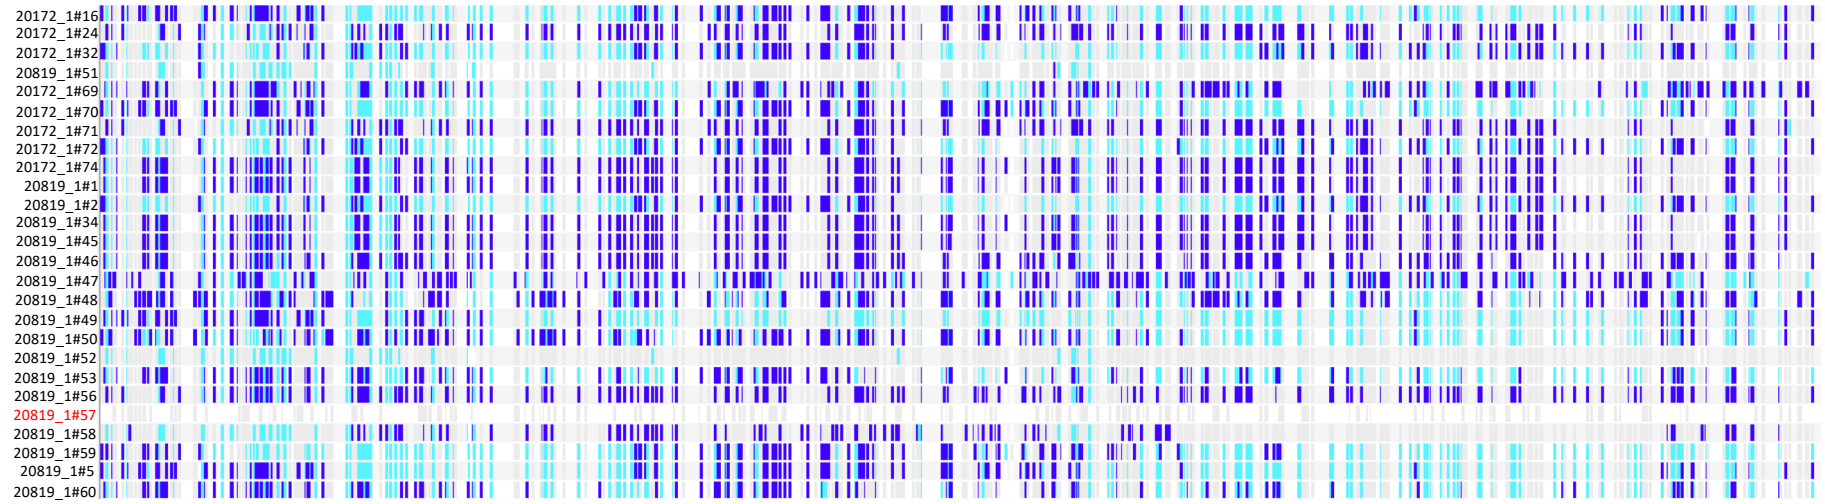

C.

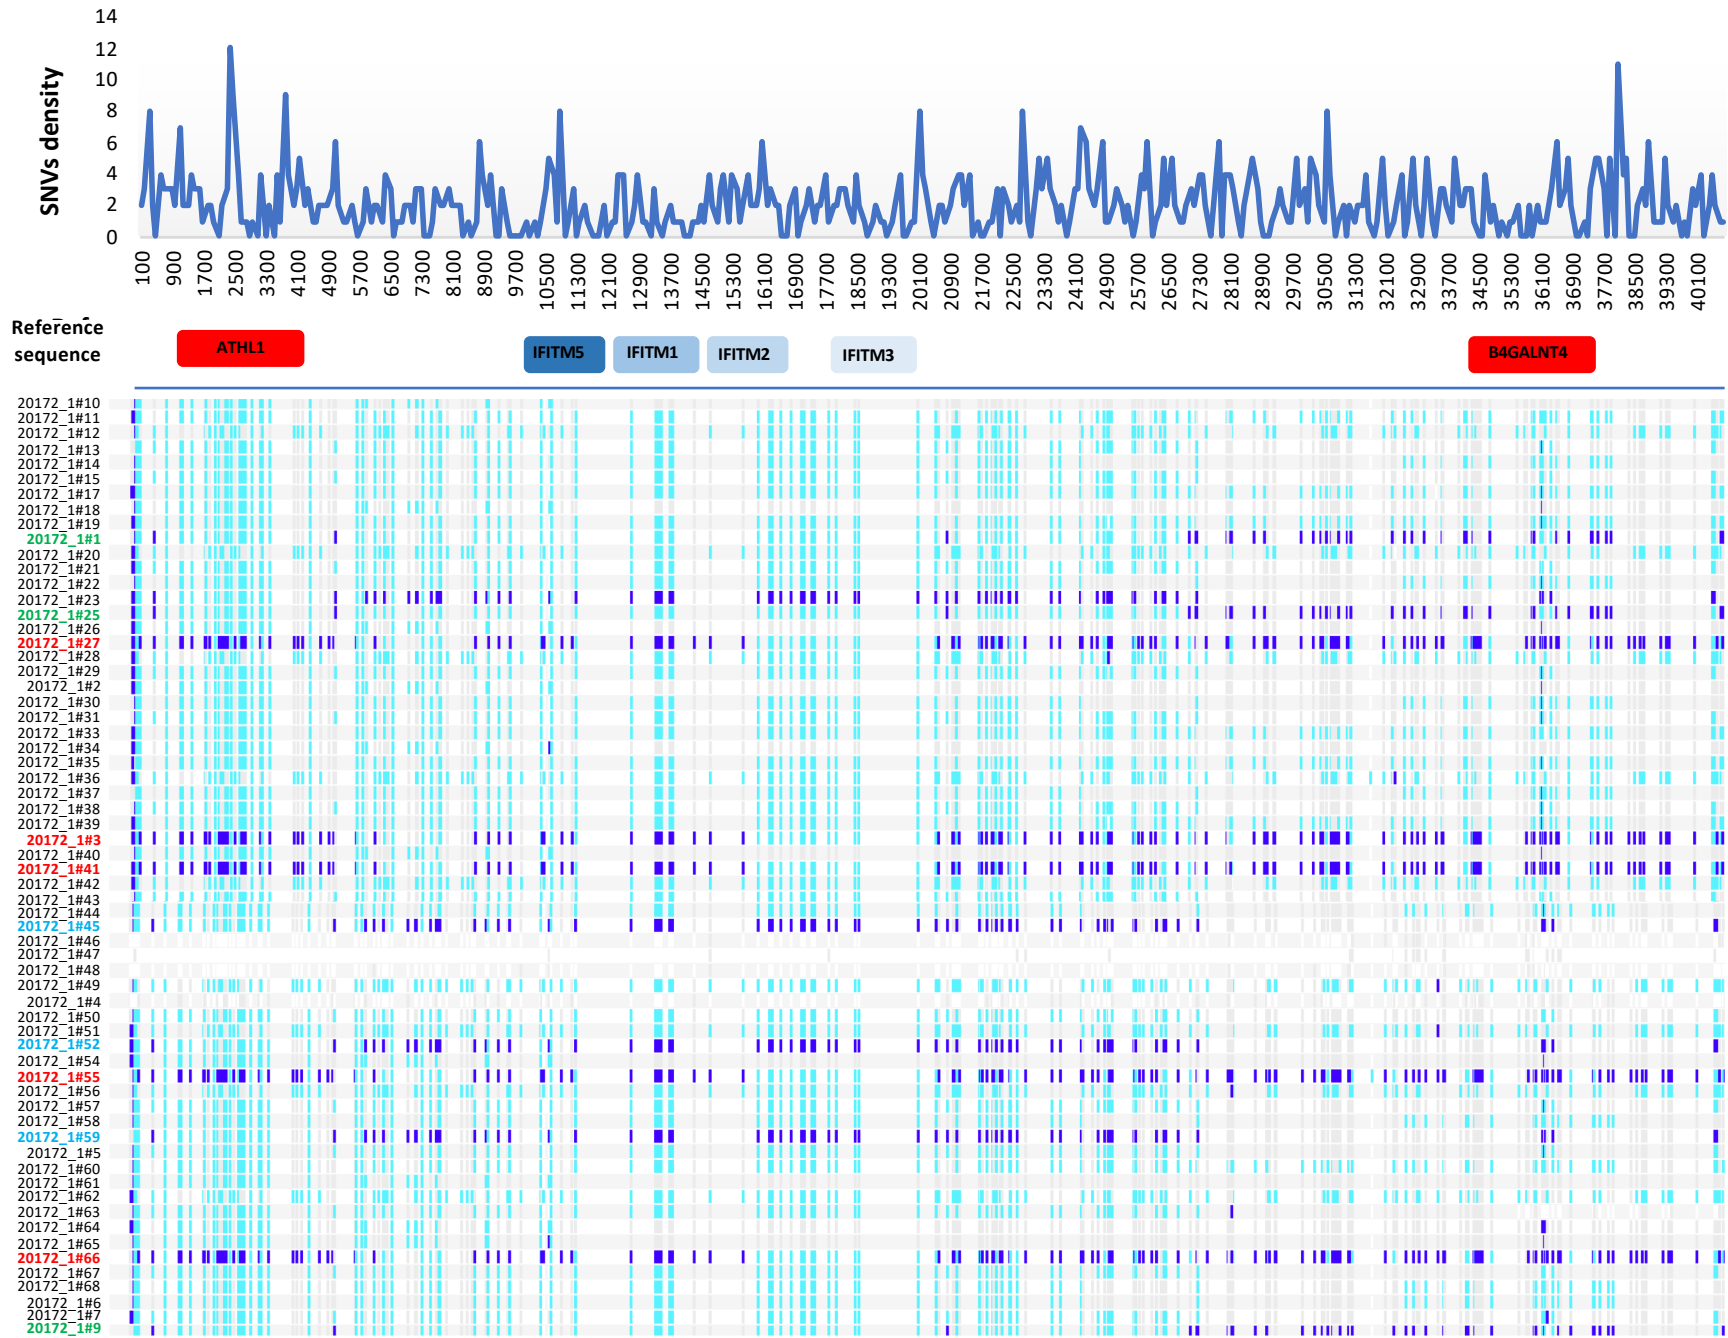

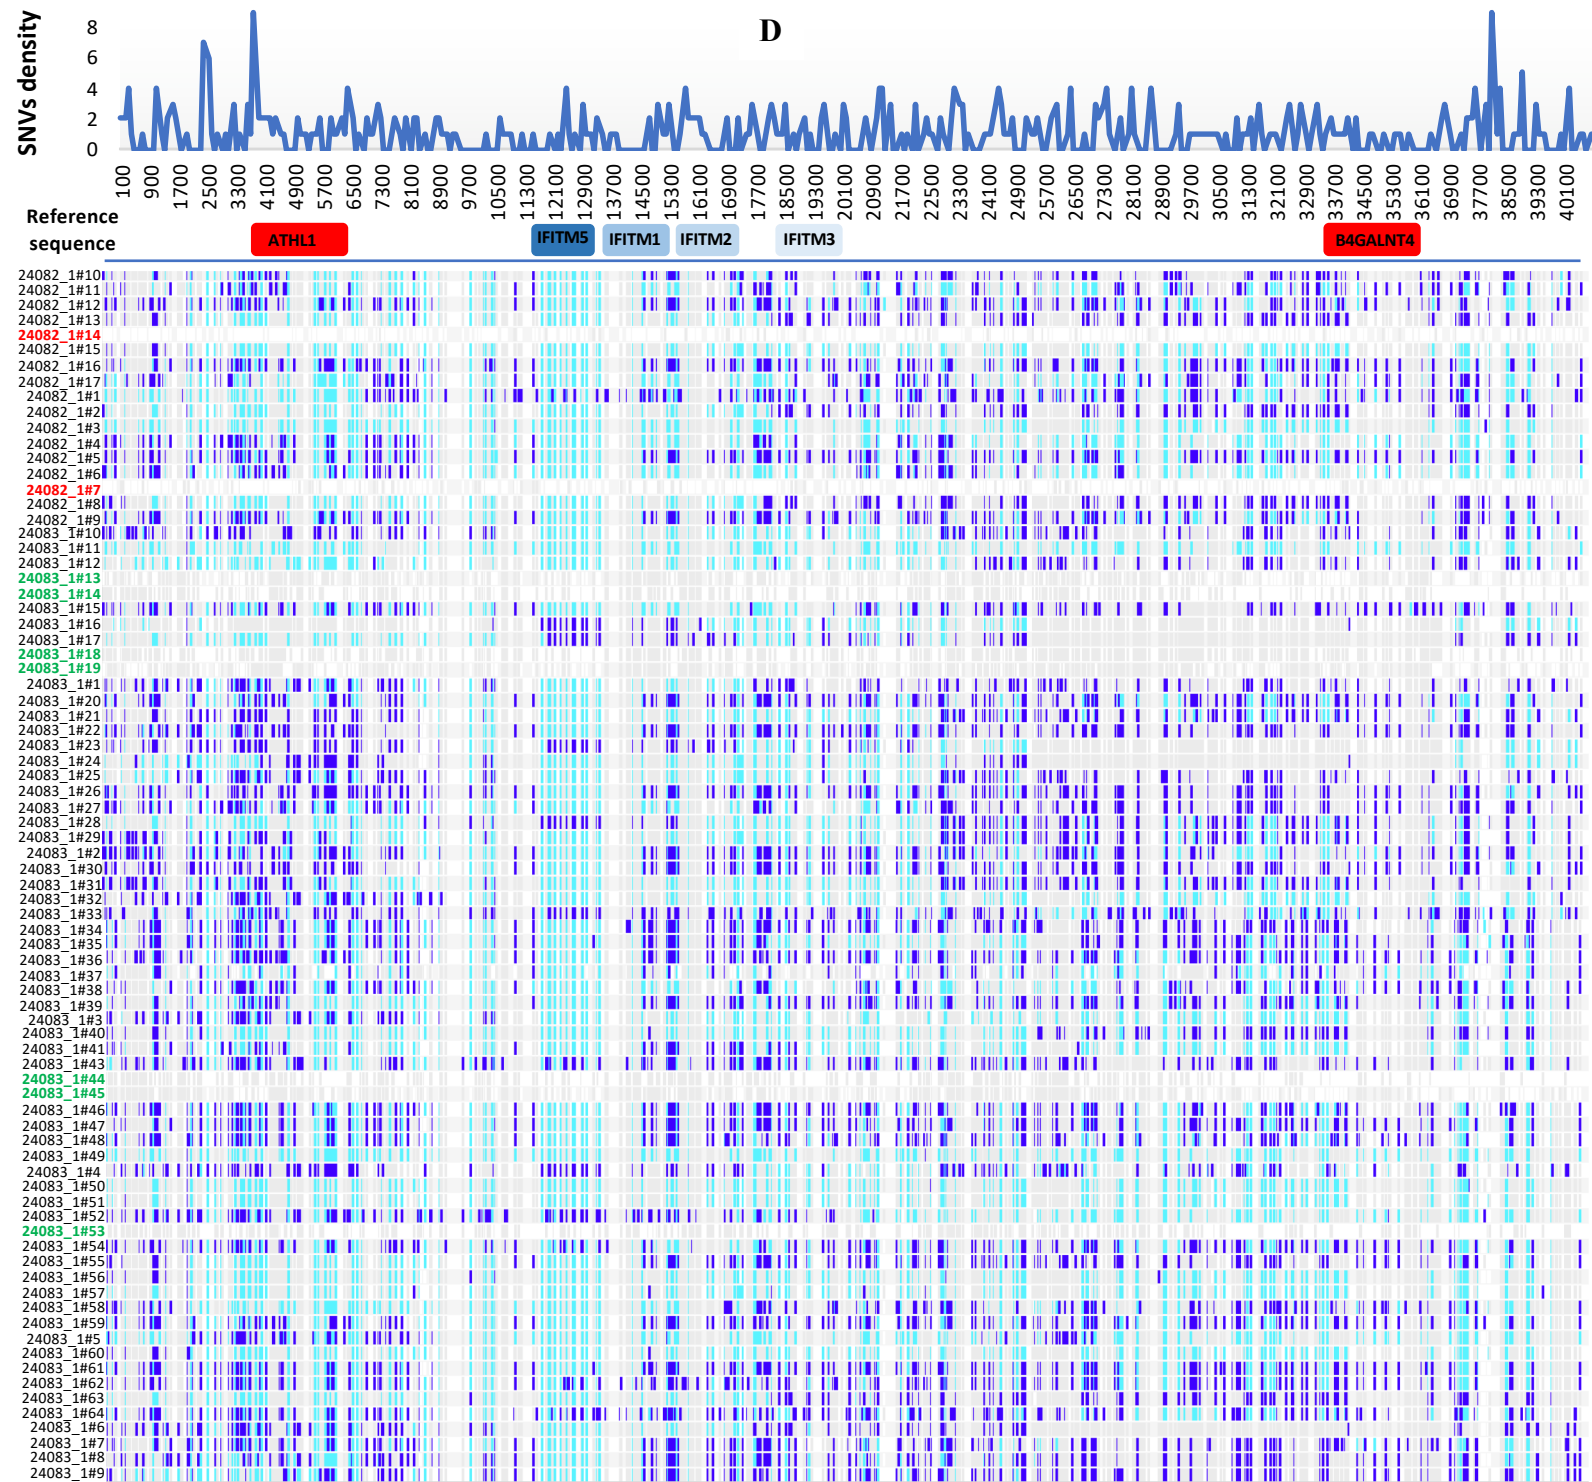

Supplement: 12864_2019_5621_MOESM1_ESM.pdf [file 12864_2019_5621_MOESM1_ESM.pdf]
